# Supplementary material for: Contribution of Physical Interactions to Signaling Specificity between a Diguanylate Cyclase and Its Effector
Source: PubMed Central journal article supplement — mBio. 2015 Dec 15;6(6):e01978-15. doi: 10.1128/mBio.01978-15 (PMC4676286; doi:10.1128/mbio.01978-15), 2015-12-15
Supplement: mbo006152597st2.pdf [file mbo006152597st2.pdf]

**Table S2. Crystallographic Data Collection and Refinement for GcbC.**

| Item                            | Value <sup>a</sup>     |
|---------------------------------|------------------------|
| Wavelength (Å)                  | 0.9771                 |
| Resolution range (Å)            | 46.5 - 3.0 (3.1 - 3.0) |
| Space group                     | P 6 <sub>2</sub>       |
| Unit cell (a, b, c)             | 141.91, 141.91, 106.17 |
| (a, b, g)                       | 90, 90, 120            |
| Total reflections               | 264,954                |
| Unique reflections              | 24,701 (2,443)         |
| Multiplicity                    | 10.7 (10.4)            |
| Completeness (%)                | 99.85 (98.47)          |
| Mean I/sigma(I)                 | 12.92 (3.07)           |
| Wilson B-factor                 | 48.41                  |
| R-sym                           | 15.2 (68.9)            |
| Reflections used for R-free (%) | 8.1                    |
| R-work (%)                      | 22.6 (30.6)            |
| R-free (%)                      | 24.3 (35.4)            |
| Number of non-hydrogen atoms    | 4,803                  |
| macromolecules                  | 4,586                  |

|                           |         |
|---------------------------|---------|
| Ligands/water             | 209 / 8 |
| Protein residues          | 612     |
| RMS (bonds)               | 0.004   |
| RMS (angles)              | 1.04    |
| Ramachandran favored (%)  | 95      |
| Ramachandran allowed (%)  | 5       |
| Ramachandran outliers (%) | 0       |
| Clashscore                | 6.31    |
| Average B-factor          | 65.70   |
| macromolecules            | 67.30   |
| ligands                   | 31.40   |
| solvent                   | 27.50   |

<sup>a</sup>Statistics for the highest-resolution shell are shown in parentheses.
