# Supplementary material for: Contribution of Physical Interactions to Signaling Specificity between a Diguanylate Cyclase and Its Effector
Source: PubMed Central journal article supplement — mBio. 2015 Dec 15;6(6):e01978-15. doi: 10.1128/mBio.01978-15 (PMC4676286; doi:10.1128/mbio.01978-15), 2015-12-15
Supplement: mbo006152597st3.pdf [file mbo006152597st3.pdf]

**Supplementary Table 3. Candidate  $\alpha 5^{GGDEF}$  Helices from PA14 For Interaction with LapD.**

| Structural Element <sup>a</sup>                           | Sequence         |
|-----------------------------------------------------------|------------------|
| <i>P. fluorescens</i> Pfl01 LapD $\alpha 2^{EAL}$ helix   | GRFLPWLER        |
| <i>P. aeruginosa</i> PA14 LapD $\alpha 2^{EAL}$ helix     | GRFLPWIER        |
| <i>P. fluorescens</i> Pfl01 GcbC $\alpha 5^{GGDEF}$ helix | EQLLFAADK        |
| <i>P. aeruginosa</i> PA14 DGC $\alpha 5^{GGDEF}$ helices  | SQTVNRADA        |
|                                                           | GALYSRADA        |
|                                                           | <b>DLLLCRVDD</b> |
|                                                           | RVLIEMADQ        |
|                                                           | SVLMSQANL        |
|                                                           | AALLHDADM        |
|                                                           | NRAHRCADD        |
|                                                           | <b>EQLYSAADQ</b> |
|                                                           | QTLMKYAGL        |
|                                                           | EGLVRAADS        |
|                                                           | DEALQRADQ        |
|                                                           | <b>KSMAKQADE</b> |
|                                                           | <b>GKLYKAADQ</b> |
|                                                           | EVVFERADQ        |
|                                                           | DHLMQHADA        |
|                                                           | PTLVKNADA        |
|                                                           | EELLKNAGL        |
|                                                           | RGLLRCADV        |
|                                                           | HELMINADA        |
|                                                           | ADLLARADQ        |
| SELMSQADV                                                 |                  |
| EEALRSADM                                                 |                  |
| EKLLQKAEQ                                                 |                  |
| SLLMKNADT                                                 |                  |
| YDLYEHADR                                                 |                  |
| DDLRRVDE                                                  |                  |
| ESLLVRADS                                                 |                  |
| DALYREADR                                                 |                  |

<sup>a</sup>Complete listing of N-terminal  $\alpha 5^{GGDEF}$  helices found in *P. aeruginosa* PA14 derived from proteins containing a GGDEF domain. The *P. fluorescens* and *P. aeruginosa* PA14 LapD homologs have nearly identical  $\alpha 2^{EAL}$  helices. The  $\alpha 5^{GGDEF}$  helices in *P. aeruginosa* PA14 were compared against the the same region from GcbC in an effort to determine potential interaction partners for *P. aeruginosa* PA14 LapD. The sequence highlighted in red belongs to RoeA, and was predicted to interact with *P. aeruginosa* PA14 LapD protein. The three bold sequences were dissimilar to the GcbC  $\alpha 5^{GGDEF}$  helix and predicted to not interact with *P. aeruginosa* PA14 LapD protein. The four highlighted sequences were tested in Figure 5B.
