# Supplementary material for: Contribution of Physical Interactions to Signaling Specificity between a Diguanylate Cyclase and Its Effector
Source: PubMed Central journal article supplement — mBio. 2015 Dec 15;6(6):e01978-15. doi: 10.1128/mBio.01978-15 (PMC4676286; doi:10.1128/mbio.01978-15), 2015-12-15
Supplement: mbo006152597st4.pdf [file mbo006152597st4.pdf]

**Table S4. Strains and Plasmids Used in this Study.**

| <b>Strain or Plasmid</b>       | <b>Genotype or Description*</b>                                                  | <b>Reference or Source</b> |
|--------------------------------|----------------------------------------------------------------------------------|----------------------------|
| <i>S. cerevisiae</i>           |                                                                                  |                            |
| InvSc1                         | MATa/MAT $\alpha$<br>leu2/leu2 trp1-289/trp1-289 ura3-52/ura3-                   | Invitrogen                 |
| <i>Echerichia coli</i>         |                                                                                  |                            |
| S17-1(lpir)                    | thi pro hsdR- hsdM+ "recA<br>RP4-2::TcMu-Km::Tn7                                 | (10)                       |
| BTH101                         | F-, cya-99 , araD139,<br>galE15, galK16, rpsL1 (Str-<br>r) , hsdR2, mcrA1, mcrB1 | Euromedex                  |
| <i>Pseudomonas fluorescens</i> |                                                                                  |                            |
| SMC 6370                       | Wildtype                                                                         | (11)                       |
| SMC 4874                       | Del-4DGC                                                                         | (12)                       |
| SMC 5981                       | Del-4DGC + pMQ72 GcbC                                                            | This Study                 |
| SMC 6068                       | Del-4DGC, Del-LapD                                                               | This Study                 |
| SMC 6077                       | Del-4DGC, Del-LapD +<br>pMQ72 LapD-GcbC                                          | This Study                 |
| SMC 6083                       | Del-4DGC, Del-LapD +<br>pMQ72 GcbC                                               | This Study                 |
| SMC 6133                       | Del-4DGC + pMQ72 GcbC<br>E360R                                                   | This Study                 |
| SMC 6138                       | Del-4DGC + pMQ72 GcbC<br>R366E                                                   | This Study                 |
| SMC 6145                       | Del-4DGC + pMQ72 GcbC<br>R363E                                                   | This Study                 |
| SMC 6154                       | Del-4DGC + pMQ72<br>pfl01_2295                                                   | This Study                 |
| SMC 6188                       | Del-4DGC + pMQ72<br>pfl01_2295 G476Q                                             | This Study                 |
| SMC 6189                       | Del-4DGC + pMQ72<br>pfl01_2295 Q483K                                             | This Study                 |
| SMC 6192                       | Del-4DGC, Del-LapD +<br>pMQ72 LapD-GcbC K485E                                    | This Study                 |
| SMC 6194                       | Del-2295                                                                         | This Study                 |
| SMC 6201                       | Del-4DGC, Del-LapD +<br>pMQ72 LapD E469K-GcbC<br>K485E                           | This Study                 |
| SMC 6204                       | Del-4DGC, Del-LapD +<br>pMQ72 LapD-GcbC E477R                                    | This Study                 |
| SMC 6205                       | Del-4DGC, Del-LapD +<br>pMQ72 LapD R463E-GcbC<br>E477R                           | This Study                 |
| SMC 6206                       | Del-4DGC, Del-LapD +                                                             | This Study                 |

|          |                                                   |            |
|----------|---------------------------------------------------|------------|
|          | pMQ72 LapD-GcbC F481K                             |            |
| SMC 6207 | Del-4DGC, Del-LapD + pMQ72 LapD W467E-GcbC F481K  | This Study |
| SMC 6208 | Del-4DGC, Del-LapD + pMQ72 LapD-GcbC D484R        | This Study |
| SMC 6209 | Del-4DGC, Del-LapD + pMQ72 LapD R470D-GcbC D484R  | This Study |
| SMC 6347 | Del-4DGC, Del-LapD :: LapD E469K + pMQ72 GcbC     | This Study |
| SMC 6348 | Del-4DGC, Del-LapD :: LapD W467E + pMQ72 GcbC     | This Study |
| SMC 6349 | Del-4DGC, Del-LapD :: LapD R470D + pMQ72 GcbC     | This Study |
| SMC 6350 | Del-4DGC, Del-LapD :: LapD R463E + pMQ72 GcbC     | This Study |
| SMC 6982 | Del-4DGC, Del-LapD, + pMQ72 LapD R463E-GcbC D484R |            |
| SMC 6983 | Del-4DGC, Del-LapD, + pMQ72 LapD R463E-GcbC K485E | This Study |
| SMC 6984 | Del-4DGC, Del-LapD, + pMQ72 LapD E469K-GcbC E477R | This Study |
| SMC 6985 | Del-4DGC, Del-LapD, + pMQ72 LapD E469K-GcbC D484R | This Study |
| SMC 6991 | Del-4DGC, Del-LapD, + pMQ72 LapD R470D-GcbC K485E | This Study |
| SMC 7072 | Del-4DGC + pMQ72 GcbC K485A                       | This Study |
| SMC 7074 | Del-4DGC + pMQ72 GcbC F481A                       | This Study |
| SMC 7075 | Del-4DGC + pMQ72 GcbC Q478A                       | This Study |
| SMC 7076 | Del-4DGC + pMQ72 GcbC E477A                       | This Study |
| SMC 7078 | Del-4DGC + pMQ72 GcbC                             | This Study |

|                                      |                                                                                       |            |
|--------------------------------------|---------------------------------------------------------------------------------------|------------|
|                                      | K485A, F481A                                                                          |            |
| SMC 7079                             | Del-4DGC + pMQ72 GcbC<br>K485A, F481A, E477A                                          | This Study |
| SMC 7081                             | Del-4DGC + pMQ72 GcbC<br>F481A, Q478A, E477A                                          | This Study |
| SMC 7082                             | Del-4DGC + pMQ72 GcbC<br>K485A, F481A, Q478A,<br>E477A                                | This Study |
| SMC 7083                             | Del-4DGC + pMQ72 GcbC<br>K485A, D484A, F481A,<br>Q478A, E477A                         | This Study |
| SMC 7115                             | Del-4DGC + pMQ72 GcbC<br>Q478A, E477A                                                 | This Study |
| SMC 4869                             | Del-GcbA, Del-GcbB, Del-<br>WspR                                                      | (12)       |
| SMC 7255                             | Del-GcbA, Del-GcbB, Del-<br>WspR + pMQ72 GcbC                                         | This Study |
| SMC 7256                             | Del-GcbA, Del-GcbB, Del-<br>WspR + pMQ72 GcbC<br>K485A, D484A, F481A,<br>Q478A, E477A | This Study |
| <b><i>Pseudomonas aeruginosa</i></b> |                                                                                       |            |
| SMC 232                              | Wildtype                                                                              | (13)       |
| SMC 6148                             | pMQ72 GcbC                                                                            | This Study |
| SMC 6150                             | pMQ72 pfl01_2295                                                                      | This Study |
| SMC 6535                             | pMQ72 pfl01_2295 G476Q                                                                | This Study |
| SMC 6536                             | pMQ72 pfl01_2295 Q483K                                                                | This Study |
| SMC 7113                             | pMQ72 GcbC K485A,<br>F481A, Q478A, E477A                                              | This Study |
| SMC 7114                             | pMQ72 GcbC K485A,<br>D484A, F481A, Q478A,<br>E477A                                    | This Study |
| <b>Plasmids</b>                      |                                                                                       | This Study |
| pUT18 LapD                           |                                                                                       | Euromedex  |
| pUT18 vector                         |                                                                                       | Euromedex  |
| pKNT25 vector                        |                                                                                       | Euromedex  |
| pKT25-zip positive control           |                                                                                       | Euromedex  |
| pUT18C-zip positive control          |                                                                                       | This Study |
| pKNT25 GcbC                          |                                                                                       | This Study |
| pMQ30 Delete LapD                    |                                                                                       | This Study |
| pMQ30 Delete pfl01_2295              |                                                                                       | This Study |
| pKNT25 GcbC GGAAF                    |                                                                                       | This Study |
| pUT18 LapD Del-HAMP                  |                                                                                       | This Study |
| pUT18 LapD K446A                     |                                                                                       | This Study |

|                                                     |  |            |
|-----------------------------------------------------|--|------------|
| pUT18 LapD E617A                                    |  | This Study |
| pKNT25 GcbC K485E                                   |  | This Study |
| pKNT25 GcbC F481K                                   |  | This Study |
| pKNT25 GcbC D484R                                   |  | This Study |
| pKNT25 GcbC E477R                                   |  | This Study |
| pKNT25 PA14_04420                                   |  | This Study |
| pKNT25 PA14_64050                                   |  | This Study |
| pKNT25 PA14_65090                                   |  | This Study |
| pKNT25 GcbC K485A,<br>F481A, Q478A, E477A           |  | This Study |
| pKNT25 GcbC K485A,<br>D484A, F481A, Q478A,<br>E477A |  | This Study |
| pUT18 PA14_LapD                                     |  | This Study |
| pKNT25 PA14_RoeA                                    |  | This Study |
| pUT18 LapD E469K                                    |  | This Study |
| pUT18 LapD W467E                                    |  | This Study |
| pUT18 LapD R470D                                    |  | This Study |
| pUT18 LapD R463E                                    |  | This Study |
| pUT18 GcbC                                          |  | This Study |
| pKNT25 pfl01_4086                                   |  | This Study |
| pKNT25 pfl01_1887                                   |  | This Study |
| pKNT25 pfl01_0190                                   |  | This Study |
|                                                     |  |            |
