# Supplementary material for: Contribution of Physical Interactions to Signaling Specificity between a Diguanylate Cyclase and Its Effector
Source: PubMed Central journal article supplement — mBio. 2015 Dec 15;6(6):e01978-15. doi: 10.1128/mBio.01978-15 (PMC4676286; doi:10.1128/mbio.01978-15), 2015-12-15
Supplement: mbo006152597st5.pdf [file mbo006152597st5.pdf]

**Table S5. Primers Used in this Study.**

| <b>Primer Number</b> | <b>Sequence</b>                                                       | <b>Information</b>               |
|----------------------|-----------------------------------------------------------------------|----------------------------------|
| 1                    | CGCGCGCCAAGCTTGATGTCTTTGTTCA<br>AACAGCTGTTGATCGCTATC                  | Clone LapD for B2H Fwd           |
| 2                    | GCGCGCGCTCTAGAGTGCCCCAGGGTT<br>TTGGCTCACCG                            | Clone LapD for B2H Rev           |
| 3                    | CGCACGCCAAGCTTGATGATCGCGAGC<br>CGCACCCCTAC                            | Clone GcbC for B2H Fwd           |
| 4                    | GCGCGCGCTCTAGAGTGGCCACGACGA<br>CCCGGTTTCG                             | Clone GcbC for B2H Rev           |
| 5                    | GAAGCCTTATCTGCAGAGCGATTTCG                                            | Sequence GcbC Middle             |
| 6                    | CTGCGTACCGAGTCCTACCAGG                                                | Sequence LapD Middle             |
| 7                    | GTTAGCTCACTCATTAGGCACCC                                               | Sequence pUT18/pKNT25<br>Forward |
| 8                    | GATGCCATCGAGTACGGCTG                                                  | Sequence pKNT25 Reverse          |
| 9                    | CCACAACAAGTCGATGCGTTCG                                                | Sequence pUT18 Reverse           |
| 10                   | GCGACGAGCGAGATCAGCCTGCGGCA<br>GCTGTTGTTTCGCGGCGGAC                    | Quick Change GcbC E477R<br>Fwd   |
| 11                   | GTCCGCCGCGAACAACAGCTGCCGAG<br>GCTGATCTCGTCTCGTCGC                     | Quick Change GcbC E477R<br>Rev   |
| 12                   | GCATTCTGTAACAAAGCGGGACC                                               | Sequence p72 Fwd                 |
| 13                   | GCTACGGCGTTTCACTTCTGAG                                                | Sequence p72 Rev                 |
| 14                   | ACCCGTTTTTTTTGGGCTAGCGAATTCGA<br>GCTCGGTACCCAGGAGCACGCGCTCAG<br>ATGTC | LapD6H-GcbCHA Vector<br>Fwd 1    |
| 15                   | ATGGTTCGGTTTCGGTATTAATGATGAT<br>GATGATGATGTCCCAGG                     | LapD6H-GcbCHA Vector Rev<br>1    |
| 16                   | ATCATCATCATCATTAAATACCGAAACC<br>GAACCATGATCGCG                        | LapD6H-GcbCHA Vector<br>Fwd 2    |
| 17                   | TGCATGCCTGCAGGTCGACTCTAGAGG<br>ATCCCCTTAAGCGTAATCTGGAACGTC<br>ATATGG  | LapD6H-GcbCHA Vector Rev<br>2    |
| 18                   | CCGATTCATTAATGCAGCTGGCAC                                              | Sequence pMQ30 Fwd               |
| 19                   | CAGCCAAGCTCGCCATTCGC                                                  | Sequence pMQ30 Rev               |
| 20                   | CGTCGGCGTCGATCAGTTGGG                                                 | Sequence p72 LapD Rev            |
| 21                   | CTGGTGCTGCATTACAAGGTGCTG                                              | Sequence p72 GcbC Fwd            |
| 22                   | GGTGCTCGACAGCCTGATCGAC                                                | Confirm LapD Deletion Fwd        |
| 23                   | CCTGGAAATGATCCGGGTA CTGATG                                            | Confirm LapD Deletion Rev        |
| 24                   | ACAGCTATGACCATGATTACGAATTCG<br>AGCTCGGTACCCCGCGGCGCGCAGGGT<br>TTCTTC  | LapD Deletion Fwd 1              |
| 25                   | GAGCGTGGGAAAGATCAGCTGAGCGC<br>GTGCTCCTAGTTAGTCG                       | LapD Deletion Rev 1              |
| 26                   | CTAGGAGCACGCGCTCAGCTGATCTTT<br>CCCACGCTCCGCGTG                        | LapD Deletion Fwd 2              |
| 27                   | CAAGCTTGCATGCCTGCAGGTCGACTC<br>TAGAGGATCCCCGGCGGCGCGGGCAAT<br>GACATC  | LapD Deletion Rev 2              |
| 28                   | TTTGGGCTAGCGAATTCGAGCTCGGTA                                           | Clone pfl01_2295 p72 Fwd         |

|    |                                                                      |                                      |
|----|----------------------------------------------------------------------|--------------------------------------|
|    | CCCACGGACTTTCATAAGGTAGTGAC<br>GTGAAG                                 |                                      |
| 29 | CTTGCATGCCTGCAGGTCGACTCTAGA<br>GGATCCCCCTAGATCAAGCCCGGCAGT<br>TTCACC | Clone pfl01_2295 p72 Rev             |
| 30 | CGAGCAGGGTCAGACCATTCCCGCCGG<br>GGAATTCCTGCCCTGGCTGGAGCGCTT<br>CGGC   | Quick Change LapD R463E<br>Fwd       |
| 31 | GCCGAAGCGCTCCAGCCAGGGCAGGA<br>ATTCCCCGGCGGGAATGGTCTGACCCT<br>GCTCG   | Quick Change LapD R463E<br>Rev       |
| 32 | CGCTTCCTGCCCTGGCTGCGGCGCTTCG<br>GCTGGACCGCGCGAC                      | Quick Change LapD E469R<br>Fwd       |
| 33 | GTCGCGCGGTCCAGCCGAAGCGCCGCA<br>GCCAGGGCAGGAAGCG                      | Quick Change LapD E469R<br>Rev       |
| 34 | GCCGGGCGCTTCCTGCCCTGGCTGGAG<br>GAATTCGGCTGGACCGCGCGACTGGAC<br>CGGTTG | Quick Change LapD R470E<br>Fwd       |
| 35 | CAACCGGTCCAGTCGCGCGGTCCAGCC<br>GAATTCCTCCAGCCAGGGCAGGAAGCG<br>CCCGGC | Quick Change LapD R470E<br>Rev       |
| 36 | CATCAGCACCTGGACGGCGACGAGCCG<br>GATCAGCCTGGAGCAGCTGTTGTTTCG           | Quick Change GcbC E473R<br>Fwd       |
| 37 | CGAACAAACAGCTGCTCCAGGCTGATCC<br>GGCTCGTCGCCGTCCAGGTGCTGATG           | Quick Change GcbC K485E<br>Rev       |
| 38 | GCAGCTGTTGTTTCGCGGGCGGACGAGGC<br>GTTGTACCAAGCCAAGG                   | Quick Change GcbC E473R<br>Fwd       |
| 39 | CCTTGGCTTGGTACAACGCCTCGTCCG<br>CCGCGAACAAACAGCTGC                    | Quick Change GcbC E473R<br>Rev       |
| 40 | CGCGCGCCAAGCTTGAAGCGAGATACA<br>CACCTGGTTGTGC                         | Clone pfl01_2295 B2H Fwd             |
| 41 | GCGCGCGCTCTAGAGTGATCAAGCCCG<br>GCAGTTTCACCG                          | Clone pfl01_2295 B2H Rev             |
| 42 | AGCTATGACCATGATTACGAATTCGAG<br>CTCGGTACCCTCGCTCGCTGGAGCTTG<br>AACATG | Pfl01_2295 Deletion Fwd 1            |
| 43 | CGTGGTTTCACTTAAGG<br>GTCACTACCTTATGGAAAGTCCGTTTTT<br>C               | Pfl01_2295 Deletion Rev 1            |
| 44 | TCCATAAGGTAGTGACCCTTAAGTGA<br>AACCACGCGGGAG                          | Pfl01_2295 Deletion Fwd 2            |
| 45 | CAAGCTTGCATGCCTGCAGGTCGACTC<br>TAGAGGATCCCCGGATGCTGCGTCGG<br>CAGAAC  | Pfl01_2295 Deletion Rev 2            |
| 46 | GGTCCCGACTAACCCCTGTGCAACAA<br>TTGATCGAAGCCGCCGATCAGGCGCTG<br>TAC     | Quick Change pfl01_2295<br>G476Q Fwd |
| 47 | GTACAGCGCCTGATCGGCGGCTTCGAT<br>CAATTGTTGCACAGGGGTTAGTCGGGA<br>ACC    | Quick Change pfl01_2295<br>G476Q Rev |
| 48 | CTGTGCAAGGTTTGATCGAAGCCGCCG                                          | Quick Change pfl01_2295              |

|    |                                                                      |                                      |
|----|----------------------------------------------------------------------|--------------------------------------|
|    | ATAAGGCGCTGTACAGTGCCAAGGCCT<br>TGGGGC                                | Q483K Fwd                            |
| 49 | GCCCCAAGGCCTTGGCACTGTACAGCG<br>CCTTATCGGCGGCTTCGATCAAACCTT<br>GCACAG | Quick Change pfl01_2295<br>Q483K Rev |
| 50 | CACTTCATTCGCCCCGAAGTGGAAAG                                           | pfl01_2295 Deletion Verify<br>Fwd    |
| 51 | CAAATGCAGCTGTCTGAGGCATACTTG                                          | pfl01_2295 Deletion Verify<br>Rev    |
| 52 | CGAGCGAGATCAGCCTGGAGCAGCTGT<br>TGAAGGCGGCGGACAAGGCGTTGTACC<br>AAGCC  | Quick Change GcbC F481K<br>Fwd       |
| 53 | GGCTTGGTACAACGCCTTGTCCGCCGC<br>CTTCAACAGCTGCTCCAGGCTGATCTC<br>GCTCG  | Quick Change GcbC F481K<br>Rev       |
| 54 | CCTGGAGCAGCTGTTGTTCGCGGCGCG<br>CAAGGCGTTGTACCAAGCCAAGGAAG<br>G       | Quick Change GcbC D484R<br>Fwd       |
| 55 | CCTTCCTTGGCTTGGTACAACGCCTTGC<br>GCGCCGCGAACAACAGCTGCTCCAGG           | Quick Change GcbC D484R<br>Rev       |
| 56 | CAGACCATTCGCCCGGGCGCTTCCTG<br>CCCGAGCTGGAGCGCTTCGGCTGGACC<br>GCGCG   | Quick Change LapD W467E<br>Fwd       |
| 57 | CGCGCGGTCCAGCCGAAGCGCTCCAGC<br>TCGGGCAGGAAGCGCCCGGCGGGAAT<br>GGTCTG  | Quick Change LapD W467E<br>Rev       |
| 58 | CGCTTCCTGCCCTGGCTGGAGGACTTC<br>GGCTGGACCGCGCGAC                      | Quick Change LapD R470D<br>Fwd       |
| 59 | GTCGCGCGGTCCAGCCGAAGTCCTCCA<br>GCCAGGGCAGGAAGCG                      | Quick Change LapD R470D<br>Rev       |
| 60 | CGCTTCCTGCCCTGGCTGAAGCGCTTC<br>GGCTGGACCGCGCG                        | Quick Change LapD E469K<br>Fwd       |
| 61 | CGCGCGGTCCAGCCGAAGCGCTTCAGC<br>CAGGGCAGGAAGCG                        | Quick Change LapD E469K<br>Rev       |
| 62 | CAGCTATGACCATGATTACGAATTCGA<br>GCTCGGTACCCCGCGGCGCGCAGGGTT<br>TCTTCG | LapD Chromosomal Insertion<br>Fwd 1  |
| 63 | TGTTTGAACAAAGACATCTGAGCGCGT<br>GCTCCTAGTTAGTCGTC                     | LapD Chromosomal Insertion<br>Rev 1  |
| 64 | TAGGAGCACGCGCTCAGATGTCTTTGT<br>TCAAACAGCTGTTGATCGC                   | LapD Chromosomal Insertion<br>Fwd 2  |
| 65 | AGCGTGGGAAAGATCAG<br>TCAGCCCCAGGGTTTTGGCTCAC                         | LapD Chromosomal Insertion<br>Rev 2  |
| 66 | CAAACCCTGGGGCTGACTGATCTTTC<br>CCACGCTCCGCG                           | LapD Chromosomal Insertion<br>Fwd 3  |
| 67 | AAGCTTGCATGCCTGCAGGTCGACTCT<br>AGAGGATCCCCGGCGGCGGGCAAT<br>GACATCC   | LapD Chromosomal Insertion<br>Rev 3  |
| 68 | TCAGTGACAAGCTTGATGTCAGTCTGCTC<br>AAGCAATTGTTCCCTCGCCATCTGC           | Clone PA14 LapD B2H Fwd              |
| 69 | GCGCGCGCTCTAGAGTGGCATCCCCGG                                          | Clone PA14 LapD B2H Rev              |

|    |                                                                       |                                |
|----|-----------------------------------------------------------------------|--------------------------------|
|    | ACCAGGGCGCC                                                           |                                |
| 70 | CGCGCGCCAAGCTTGGCCAGAACGACG<br>CTCGAATCGATCC                          | Clone PA14 RoeA B2H Fwd        |
| 71 | GCGCGCGCTCTAGAGTCCGCAGGCTTT<br>CCGCGAGGCTG                            | Clone PA14 RoeA B2H Rev        |
| 72 | CGCGCGCCAAGCTTGCGGCGCTTACGC<br>TTTCCCCGCAAG                           | Clone PA14 04420 B2H Fwd       |
| 73 | GCGCGCGCTCTAGAGTGCAACAGGCCA<br>CGCAATCGCGACG                          | Clone PA14 04420 B2H Rev       |
| 74 | CGCGCGCCAAGCTTGATGATGACCGAG<br>CACGATGACCCGAC                         | Clone PA14 64050 B2H Fwd       |
| 75 | GAGCGCGCTCTAGAGTCCGGGCGTTCGG<br>GACGATATAACC                          | Clone PA14 64050 B2H Rev       |
| 76 | CGCGCGCCAAGCTTGGGTATTGCCTGC<br>CGTCGGCCGG                             | Clone PA14 65090 B2H Fwd       |
| 77 | GCGCGCGCTCTAGAGTGGAGATACGCT<br>CCGGTGCCAGGG                           | Clone PA14 65090 B2H Rev       |
| 78 | CGCGCGCCAAGCTTGATGAAGCAAAG<br>CGGACTCTCGGAACG                         | Clone pfl01_4086 B2H Fwd       |
| 79 | GCGCGCGCTCTAGAGTACGGAACGTGC<br>CAGGCGCCTTG                            | Clone pfl01_4086 B2H Rev       |
| 80 | CGCGCGCCTCTAGACATGCCGAAATCT<br>GTTGACCGTATTCCGC                       | Clone pfl01_1887 B2H Fwd       |
| 81 | GCGCGCGGAGCTCCCTTCCAGCAATCCCTTC<br>AATCCCTCAAGC                       | Clone pfl01_1887 B2H Rev       |
| 82 | CGCGCGCCAAGCTTGATGGTCAACAAC<br>AATCAAAAAGACTCATCCC                    | Clone pfl01_0190 B2H Fwd       |
| 83 | GCGTCCGCTCTAGAGTGGCGGAAATGA<br>TCCGGTTCTTGCC                          | Clone pfl01_0190 B2H Rev       |
| 84 | GCCTGGAGCAGCTGTTGTTTCGCGGCGG<br>ACGCGGCGTTGTACCAAGCCAAGGAAG<br>GTGGGC | Quick Change GcbC K485A<br>Fwd |
| 85 | GCCACCTTCCCTTGGCTTGGTACAACG<br>CCGCGTCCGCCGGAACAACAGCTGCT<br>CCAGGC   | Quick Change GcbC K485A<br>Rev |
| 86 | GCGAGATCAGCCTGGAGCAGCTGTTGG<br>CCGCGGCGGACAAGGCGTTGTACCAAG<br>CCAAG   | Quick Change GcbC F481A<br>Fwd |
| 87 | CTTGGCTTGGTACAACGCCTTGTCCGCC<br>GCGGCCAACAGCTGCTCCAGGCTGATC<br>TCGC   | Quick Change GcbC F481A<br>Rev |
| 88 | CGGCGACGAGCGAGATCAGCCTGGAG<br>GCGCTGTTGTTTCGCGGCGGACAAGGCG<br>TTGTACC | Quick Change GcbC Q478A<br>Fwd |
| 89 | GGTACAACGCCTTGTCCGCCGCGAACA<br>ACAGCGCCTCCAGGCTGATCTCGCTCG<br>TCGCCG  | Quick Change GcbC Q478A<br>Rev |
| 90 | CCTGGACGGCGACGAGCGAGATCAGCC                                           | Quick Change GcbC E477A        |

|     |                                                                      |                                                               |
|-----|----------------------------------------------------------------------|---------------------------------------------------------------|
|     | TGGCGCAGCTGTTGTTTCGCGGCGGACA<br>AGGCG                                | Fwd                                                           |
| 91  | CGCCTTGTCCGCCGCGAACAACAGCTG<br>CGCCAGGCTGATCTCGCTCGTCGCCGT<br>CCAGG  | Quick Change GcbC E477A<br>Rev                                |
| 92  | GATCAGCCTGGAGCAGCTGTTGGCCGC<br>GGCGGACGCGGCGTTGTACCAAGCCAA<br>GGAAGG | Quick Change GcbC K851A,<br>F481A Fwd                         |
| 93  | CCTTCCTTGGCTTGGTACAACGCCGCGT<br>CCGCCGCGGCCAACAGCTGCTCCAGGC<br>TGATC | Quick Change GcbC K485A,<br>F481A Rev                         |
| 94  | GGACGGCGACGAGCGAGATCAGCCTG<br>GCGGCGCTGTTGTTTCGCGGCGGACAAG<br>GCGTTG | Quick Change GcbC Q478A,<br>E477A Fwd                         |
| 95  | CAACGCCTTGTCCGCCGCGAACAACAG<br>CGCCGCCAGGCTGATCTCGCTCGTCGC<br>CGTCC  | Quick Change GcbC Q478A,<br>E477A Rev                         |
| 96  | CGAGCGAGATCAGCCTGGCGCAGCTGT<br>TGGCCGCGGCGGACGCGGCGTTGTACC<br>AAGCC  | Quick Change GcbC K485A,<br>F481A, E477A Fwd                  |
| 97  | GGCTTGGTACAACGCCGCGTCCGCCGC<br>GGCCAACAGCTGCGCCAGGCTGATCTC<br>GCTCG  | Quick Change GcbC K485A,<br>F481A, E477A Rev                  |
| 98  | CGGCGACGAGCGAGATCAGCCTGGCG<br>GCGCTGTTGGCCGCGGCGGACAAGGCG<br>TTGTACC | Quick Change GcbC F481A,<br>Q478A, E477A Fwd                  |
| 99  | GGTACAACGCCTTGTCCGCCGCGGCCA<br>ACAGCGCCGCCAGGCTGATCTCGCTCG<br>TCGCCG | Quick Change GcbC F481A,<br>Q478A, E477A Rev                  |
| 100 | CGAGCGAGATCAGCCTGGCGGCGCTGT<br>TGGCCGCGGCGGACGCGGCGTTGTACC<br>AAGCC  | Quick Change GcbC K485A,<br>F481A, Q478A, E477A Fwd           |
| 101 | GGCTTGGTACAACGCCGCGTCCGCCGC<br>GGCCAACAGCGCCGCCAGGCTGATCTC<br>GCTCG  | Quick Change GcbC K485A,<br>F481A, Q478A, E477A Rev           |
| 102 | GCGAGATCAGCCTGGCGGCGCTGTTGG<br>CCGCGGCGGCCGCGGCGTTGTACCAAG<br>CCAAG  | Quick Change GcbC K485A,<br>D484A, F481A, Q478A,<br>E477A Fwd |
| 103 | CTTGGCTTGGTACAACGCCGCGGCCGC<br>CGCGGCCAACAGCGCCGCCAGGCTGAT<br>CTCGC  | Quick Change GcbC K485A,<br>D484A, F481A, Q478A,<br>E477A Rev |

---
